# Supplementary figures and images for: Skating by: low energetic costs of swimming in a batoid fish
Source: Oxford University Press journal article supplement (doi:10.1242/jeb.136358), 2016-01-01

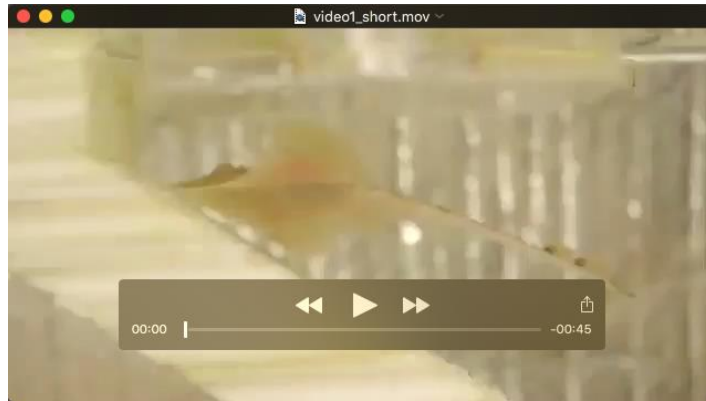

**Movie 1.** Little skate, *Leucoraja erinacea*, swimming in a Brett-type swim tunnel at 1.25 body lengths  $s^{-1}$ .

Supplement: jeb136358supp.pdf [file jeb136358supp.pdf]
